# Supplementary material for: Quaternization-induced catalyst-free synthesis of viologen-linked ionic polyacetylenes towards heterogeneous catalytic CO2fixation
Source: Royal Society of Chemistry journal article supplement (doi:10.1039/d1ta10312a), 2022-01-01
Supplement: d1ta10312a1.pdf [file d1ta10312a1.pdf]

## **Electronic Supplementary Information**

### **Quaternization-induced catalyst-free synthesis of viologen-linked ionic polyacetylenes towards heterogeneous catalytic CO<sub>2</sub> fixation**

Zixuan Xu, Ke Liu, He Huang, Yadong Zhang, Minman Tong, Zhouyang Long and Guojian Chen\*

School of Chemistry and Materials Science, Jiangsu Key Laboratory of Green Synthetic Chemistry for Functional Materials, Jiangsu Normal University, Xuzhou, 221116, China.

\*Corresponding author, E-mail: [gjchen@jsnu.edu.cn](mailto:gjchen@jsnu.edu.cn)

**Table S1** The solubility of a series of VIPA-X-T solid materials.\*

| Sample             | Polymer yield (%) | H <sub>2</sub> O (RT) | H <sub>2</sub> O (80 °C) | DMSO (RT) | DMSO (80 °C)       |
|--------------------|-------------------|-----------------------|--------------------------|-----------|--------------------|
| VIPA-Br-30         | 53                | ×                     | partially soluble        | ×         | completely soluble |
| VIPA-Br-60         | 81                | ×                     | slightly soluble         | ×         | partially soluble  |
| VIPA-Br-80         | 86                | ×                     | ×                        | ×         | slightly soluble   |
| <b>VIPA-Br-100</b> | <b>91</b>         | ×                     | ×                        | ×         | ×                  |
| VIPA-Cl-30         | 40                | ×                     | partially soluble        | ×         | completely soluble |
| VIPA-Cl-60         | 59                | ×                     | slightly soluble         | ×         | partially soluble  |
| VIPA-Cl-80         | 72                | ×                     | ×                        | ×         | slightly soluble   |
| <b>VIPA-Cl-100</b> | <b>87</b>         | ×                     | ×                        | ×         | ×                  |

\* The solubility tests were carried out by placing 10 mg the back polymer in 5 mL water or DMSO at room temperature (RT) or 80 °C with stirred for 30 min. The results for the solubility of VIPA-X-T were together determined by the color of solutions and the mass of the remaining solid polymers after centrifugation.

“×” represents insoluble.

**Table S2** The elemental compositions of VIPA-Cl and VIPA-Br and the reused catalyst VIPA-Br-R detected from the XPS spectra. <sup>a</sup>

| Samples   | C (at%) | N (at%) | O (at%) | Cl (at%) | Br (at%) |
|-----------|---------|---------|---------|----------|----------|
| VIPA-Cl   | 77.38   | 8.91    | 7.13    | 6.57     | -        |
| VIPA-Br   | 77.22   | 8.97    | 5.71    | -        | 8.11     |
| VIPA-Br-R | 77.34   | 9.55    | 4.53    | -        | 8.57     |

<sup>a</sup> All elemental compositions were presented by the atomic concentration (at%).

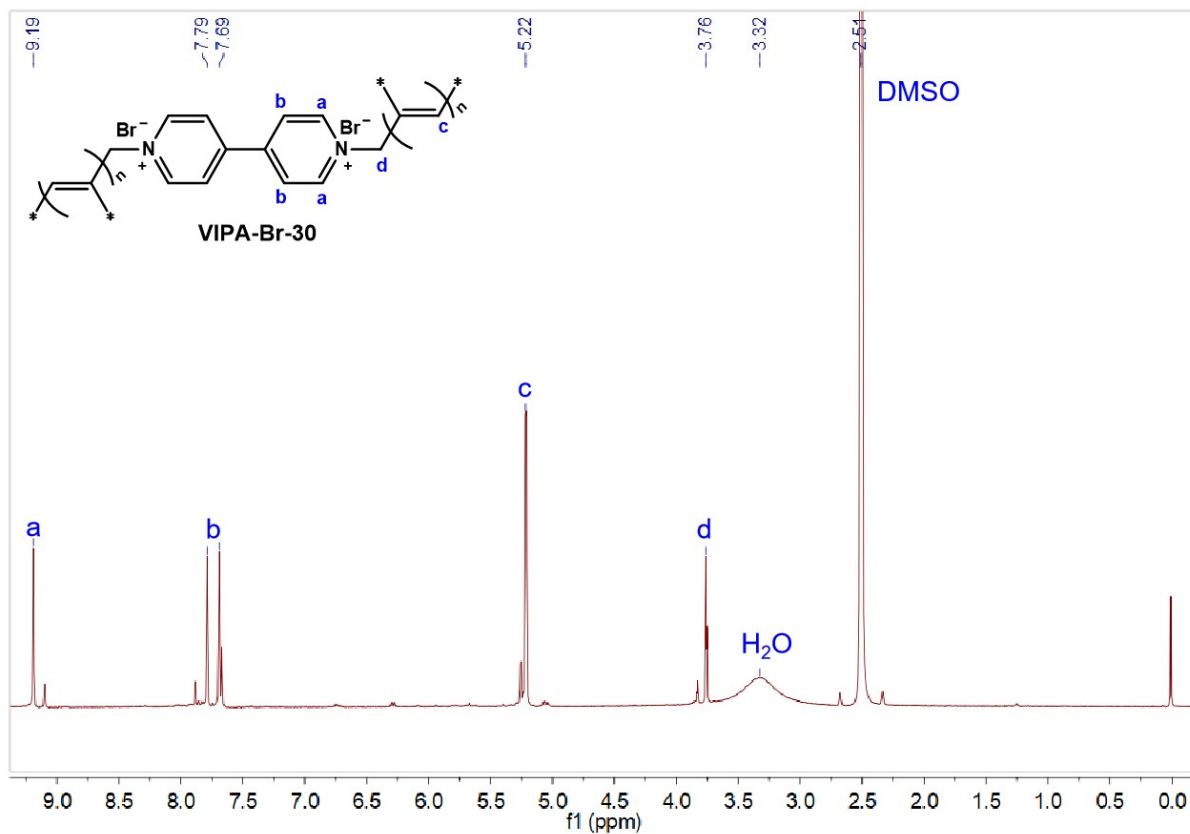

**Fig. S1** <sup>1</sup>H NMR spectrum of VIPA-Br-30 in DMSO-*d*<sub>6</sub>.

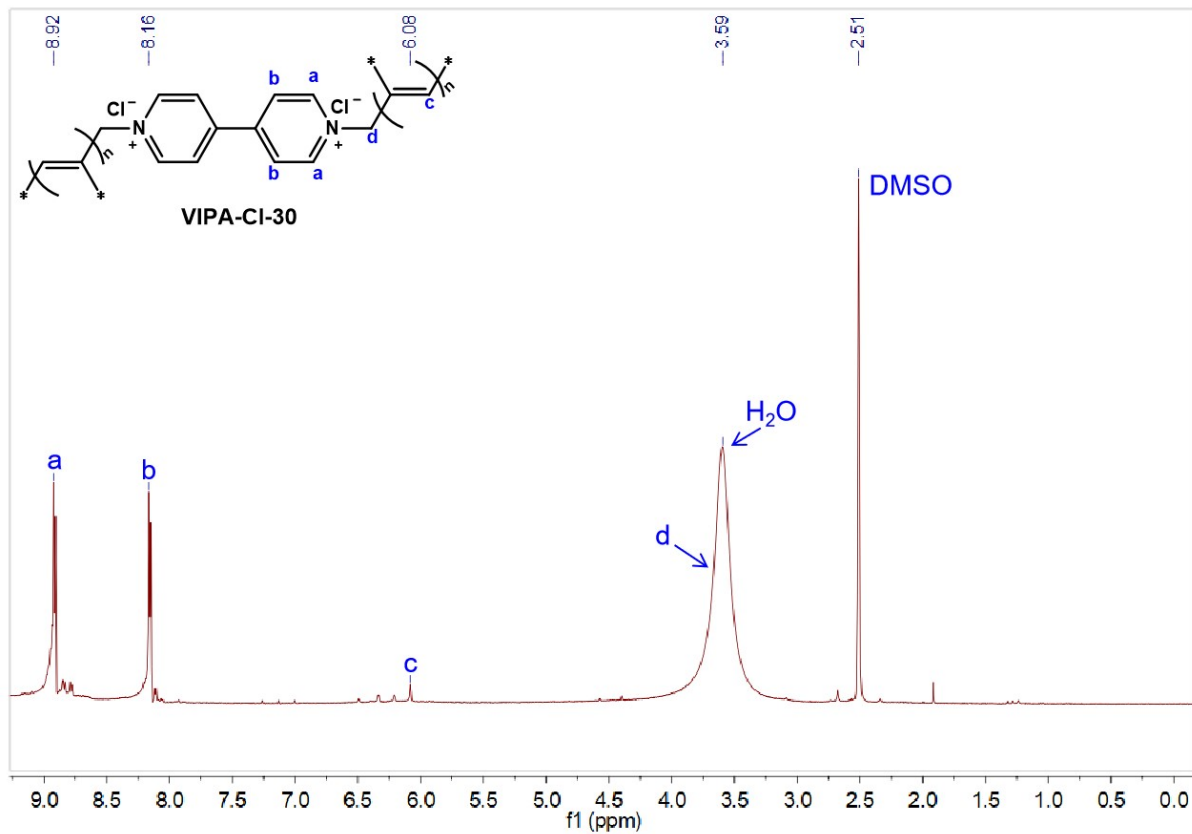

**Fig. S2** <sup>1</sup>H NMR spectrum of VIPA-Cl-30 in DMSO-*d*<sub>6</sub>.

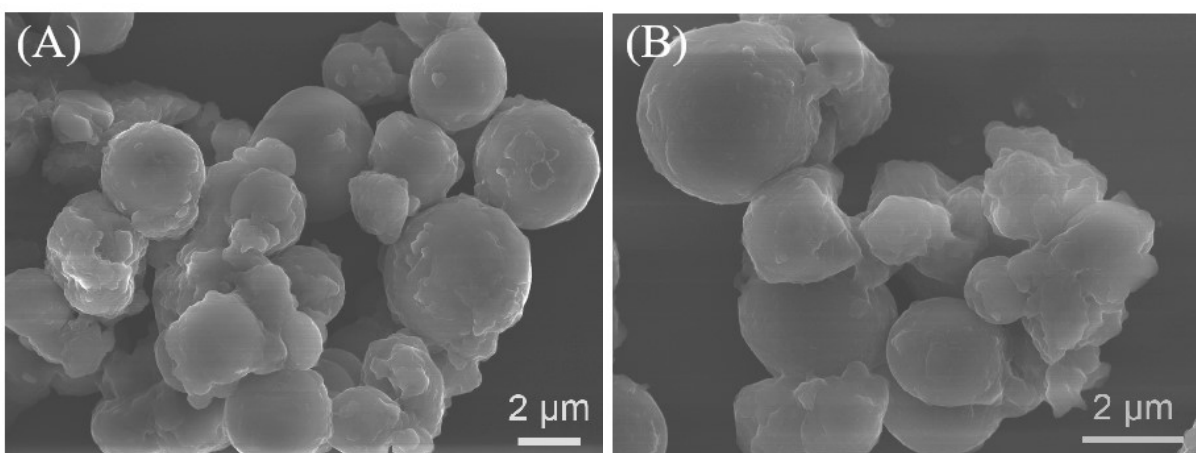

Fig. S3 SEM images of (A) VIPA-Br and (B) VIPA-Cl.

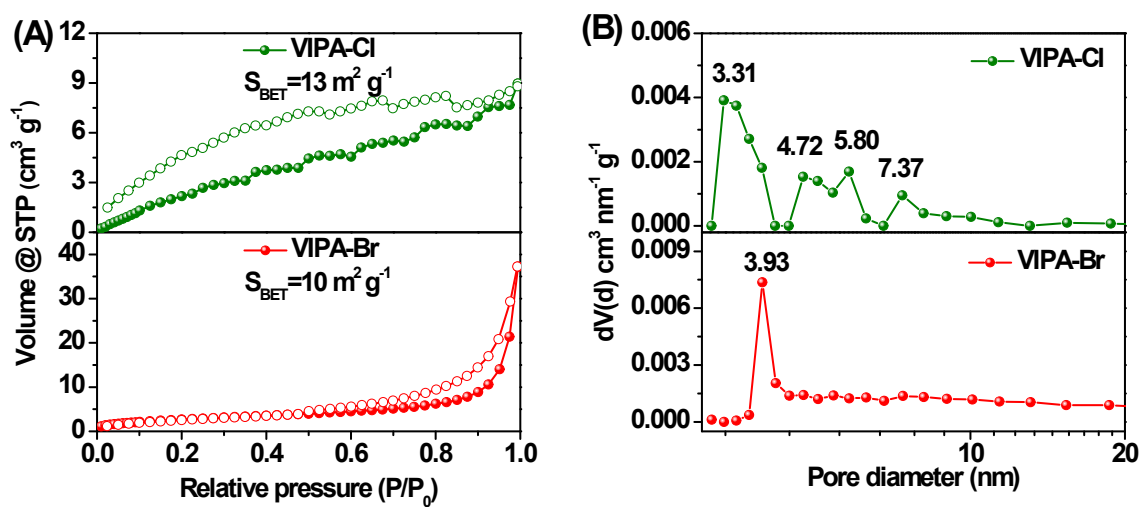

Fig. S4 (A)  $N_2$  adsorption-desorption isotherms and (B) BJH pore size distributions of VIPA-Br and VIPA-Cl.

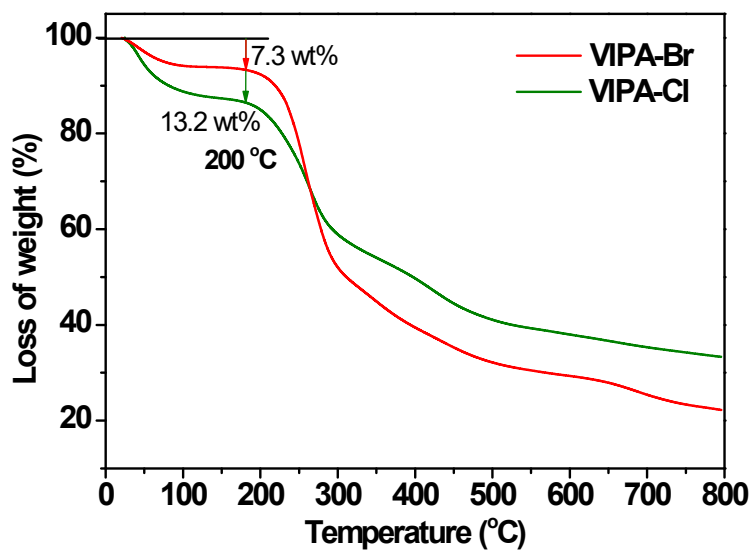

**Fig. S5** Thermogravimetric analysis (TGA) curves of VIPA-Br and VIPA-Cl.

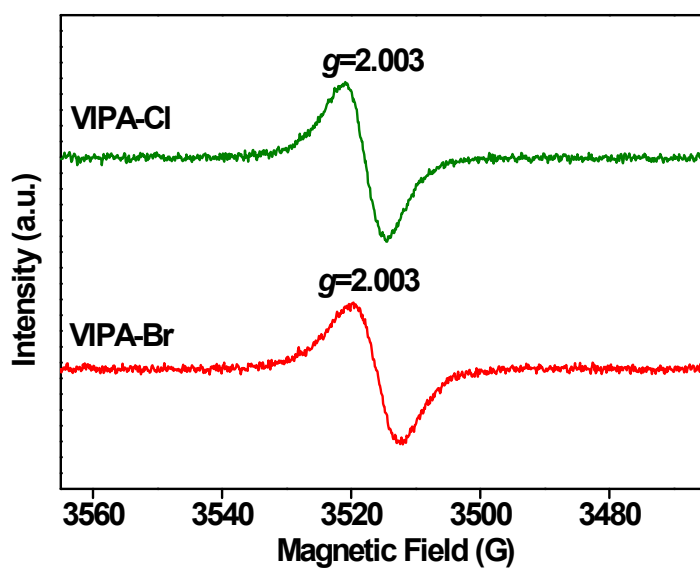

**Fig. S6** Solid-state EPR spectra of VIPA-Br and VIPA-Cl at the X-band under room temperature.

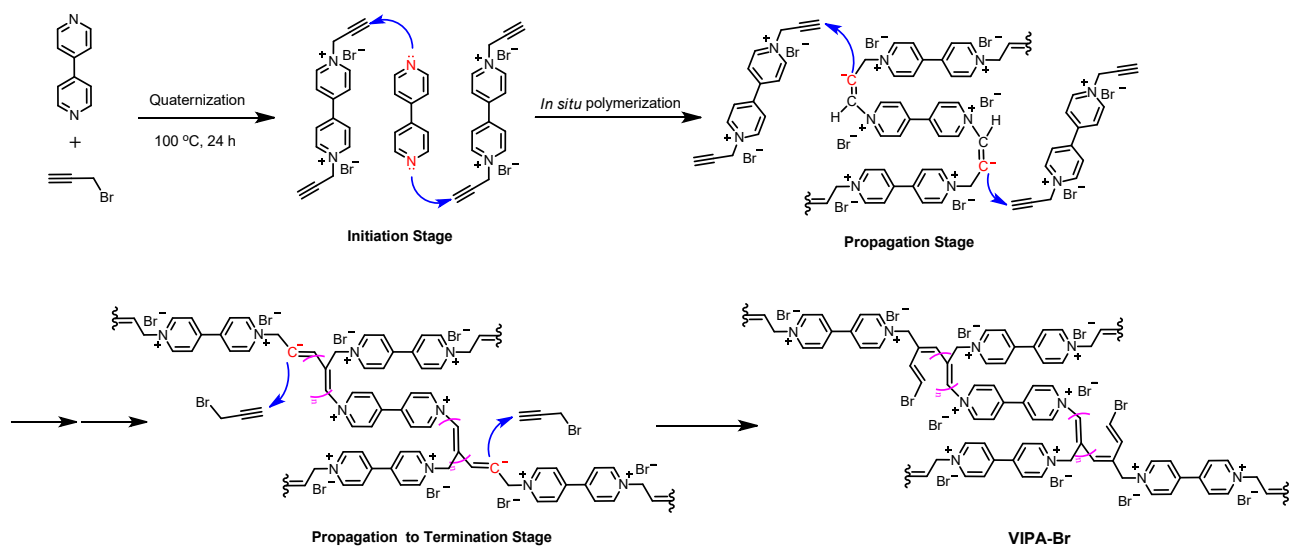

**Scheme S1** A proposed polymerization mechanism for the synthesis of VIPA-Br.

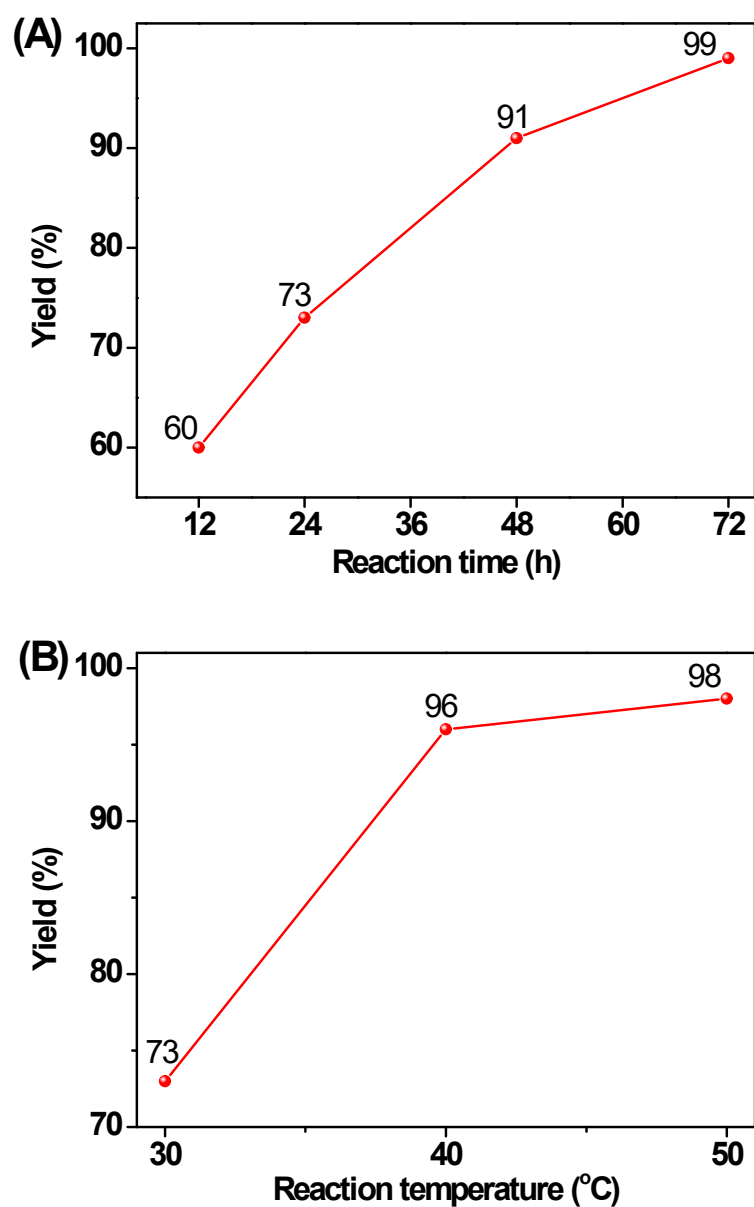

**Fig. S7** (A) Kinetic curve: reaction time effect of VIPA-Br for the conversion of CO<sub>2</sub> with epichlorohydrin. Reaction conditions: epichlorohydrin (2 mmol), catalyst (40 mg), CO<sub>2</sub> balloon (0.1 MPa), 30 °C, 12-72 h. (B) Reaction temperature effect of VIPA-Br for the conversion of CO<sub>2</sub>. Reaction conditions: epichlorohydrin (2 mmol), catalyst (40 mg), CO<sub>2</sub> balloon (0.1 MPa), 30-50 °C, 24 h.

**Table S3** The detailed comparisons of the catalytic activity over various metal-free iPOPs and iPOPs with HBD groups or metal sites heterogeneous catalysts in the CO<sub>2</sub> fixation with ECH without any co-catalysts.<sup>#</sup>

| Catalyst                     | CO <sub>2</sub> pressure (MPa) | Temperature (°C) | Time (h)  | Yield (%) | Ref.             |
|------------------------------|--------------------------------|------------------|-----------|-----------|------------------|
| PCP-Cl                       | 3                              | 100              | 12        | 98        | S1               |
| cCTF-500                     | 1                              | 90               | 12        | 95        | S2               |
| PS-Cat 5                     | 1                              | 45               | 18        | 94        | S3               |
| CCTF-350                     | 0.1                            | 120              | 24        | 93.1      | S4               |
| PDmBr                        | 0.1                            | 120              | 12        | 91.3      | S5               |
| COP-222                      | 0.1                            | 100              | 24        | 99        | S6               |
| CPP-IL0.05                   | 0.1                            | 100              | 24        | 99        | S7               |
| IP3                          | 0.1                            | 100              | 24        | 99        | S8               |
| PDBA-Cl-SCD                  | 0.1                            | 90               | 6         | 99.3      | S9               |
| PVIm-6-SCD                   | 0.1                            | 50               | 24        | 98.2      | S10              |
| HIP-Br-2                     | 0.1                            | 70               | 96        | 90        | S11              |
| V-PCIF-Br                    | 0.1                            | 80               | 72        | 97        | S12              |
| V-iPHP-1                     | 0.1                            | 60               | 72        | 99        | S13              |
| Phen <sup>+</sup> -PHP-2Br   | 0.1                            | 60               | 72        | 99        | S14              |
| VIP-Br                       | 0.1                            | 40               | 72        | 99        | S15              |
| PIP-Bn-Cl                    | 0.1                            | 25               | 80        | 94.7      | S16              |
| <b>VIPA-Br</b>               | <b>0.1</b>                     | <b>40</b>        | <b>24</b> | <b>96</b> | <b>This work</b> |
| <b>VIPA-Br</b>               | <b>0.1</b>                     | <b>30</b>        | <b>72</b> | <b>99</b> | <b>This work</b> |
| PGDBr-5-2OH                  | 0.1                            | 70               | 24        | 91        | S17              |
| PPS-mOH-Bn                   | 0.1                            | 50               | 72        | 78        | S18              |
| POF-PNA-Br                   | 0.1                            | 40               | 48        | 94.1      | S19              |
| IMIN-Br-OH                   | 0.1                            | 40               | 72        | 99        | S20              |
| NHC-CAP-1(Zn <sup>2+</sup> ) | 2                              | 100              | 3         | 97        | S21              |
| Al-iPOP-1                    | 1                              | 40               | 6         | 99        | S22              |
| Co-HIP                       | 0.1                            | 80               | 20        | 99        | S23              |
| ZnBr <sub>2</sub> @Bpy-PHP-4 | 0.1                            | 80               | 72        | 99        | S24              |
| iPHCP-22                     | 0.1                            | 60               | 60        | 99        | S25              |
| Py-Im-6-Zn-5-SCD             | 0.1                            | 30               | 18        | 97        | S26              |
| CPIP-A-4                     | 0.1                            | 30               | 12        | 95        | S27              |

<sup>#</sup> It should be pointed out that different catalysts were evaluated under different conditions. Thus, it is difficult to directly compare the activity between different catalytic systems. The represented catalytic activities using yields of the product in Table S3 should be considered in a reasonable comparison.



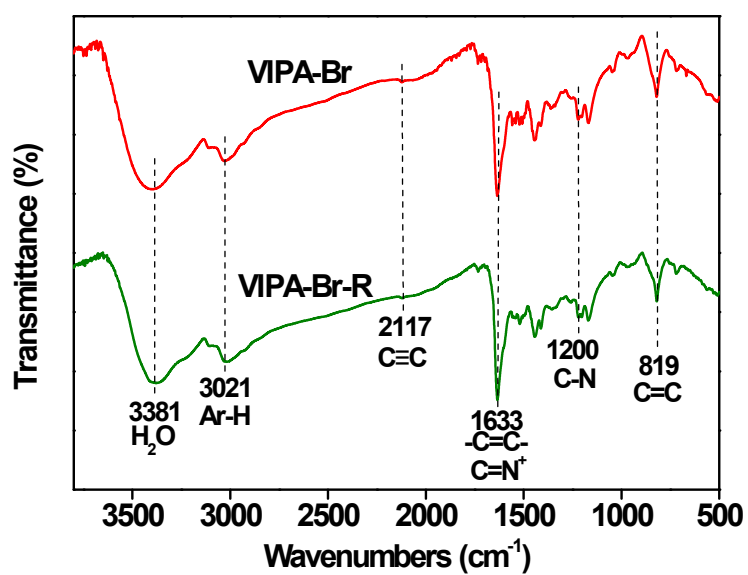

**Fig. S8** FTIR of the fresh catalyst VIPA-Br and the reused catalyst VIPA-Br-R.

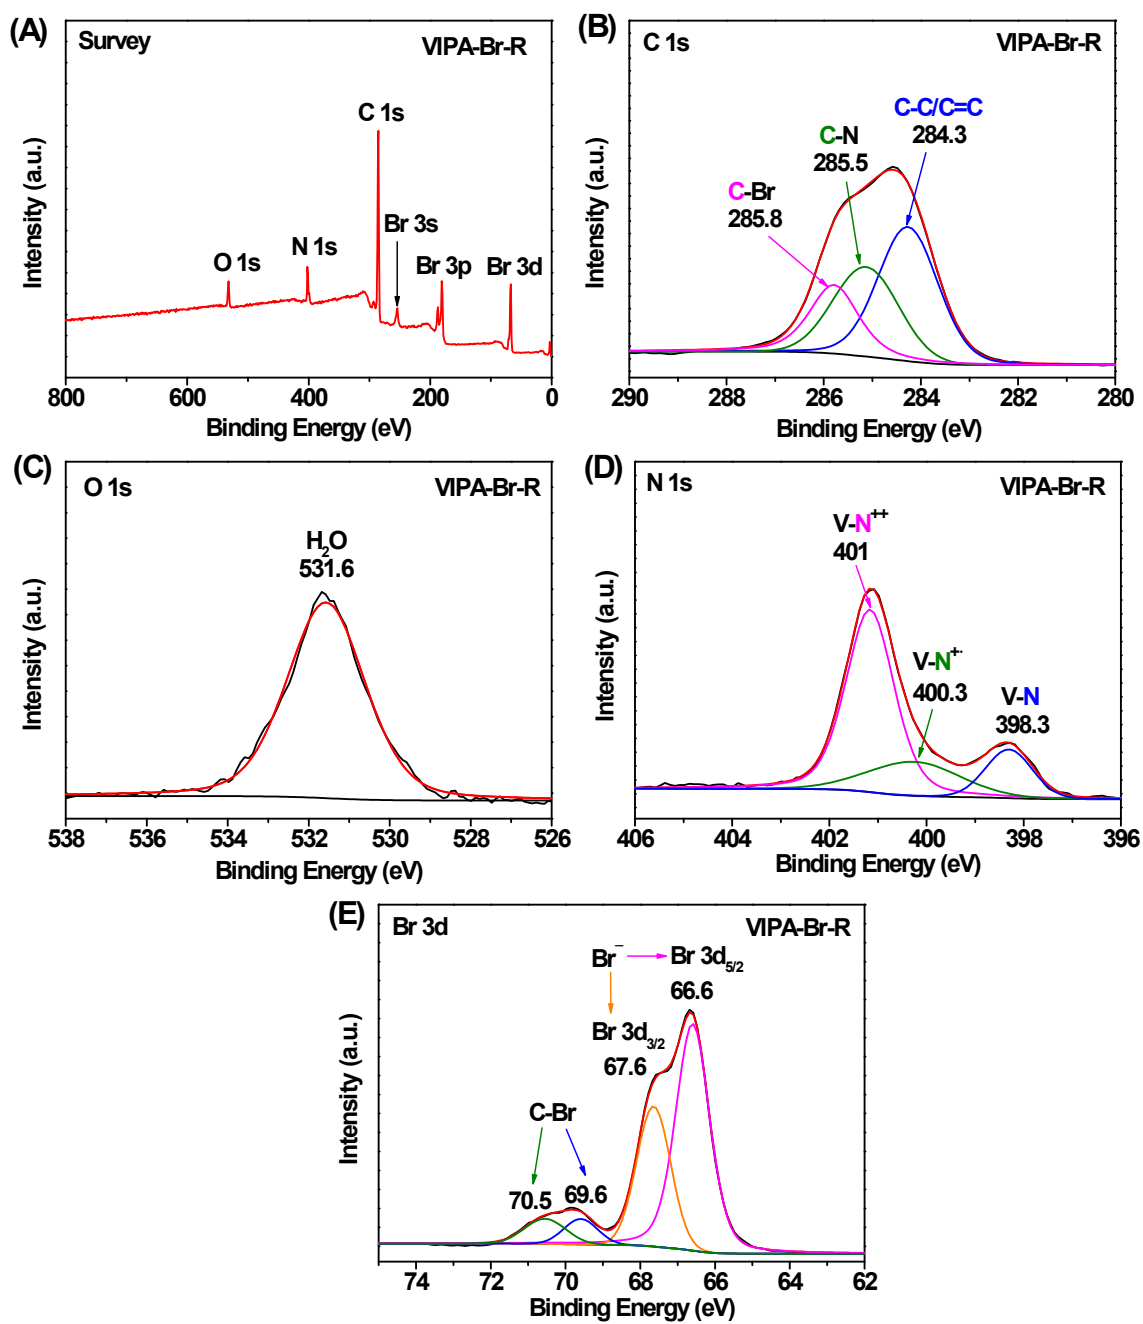

Fig. S9 XPS spectra of the reused catalyst VIPA-Br-R: (A) Survey, (B) C 1s, (C) O 1s, (D) N 1s and (E) Br 3d.

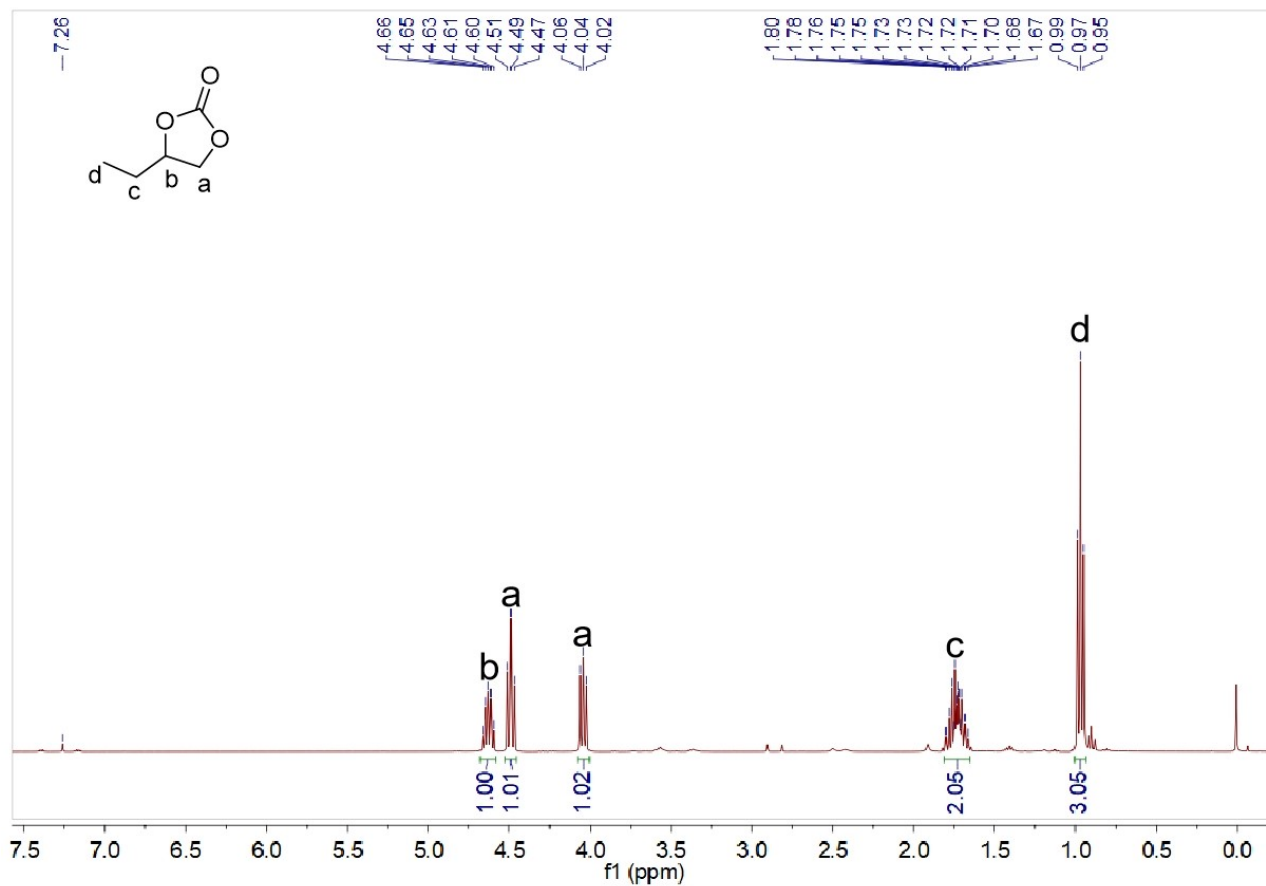

**Fig. S10** <sup>1</sup>H NMR spectrum of 4-ethyl-1,3-dioxolan-2-one (400 MHz, CDCl<sub>3</sub>): δ=4.66~4.60 (1H, CH), 4.51~4.47 (1H, CH<sub>2</sub>), 4.06~4.02 (1H, CH<sub>2</sub>), 1.80~1.67 (2H, CH<sub>2</sub>), 0.99~0.95 ppm (3H, CH<sub>3</sub>). Reaction conditions: VIPA-Br, 30 °C, 72 h, yield of 99%, selectivity of 99%.

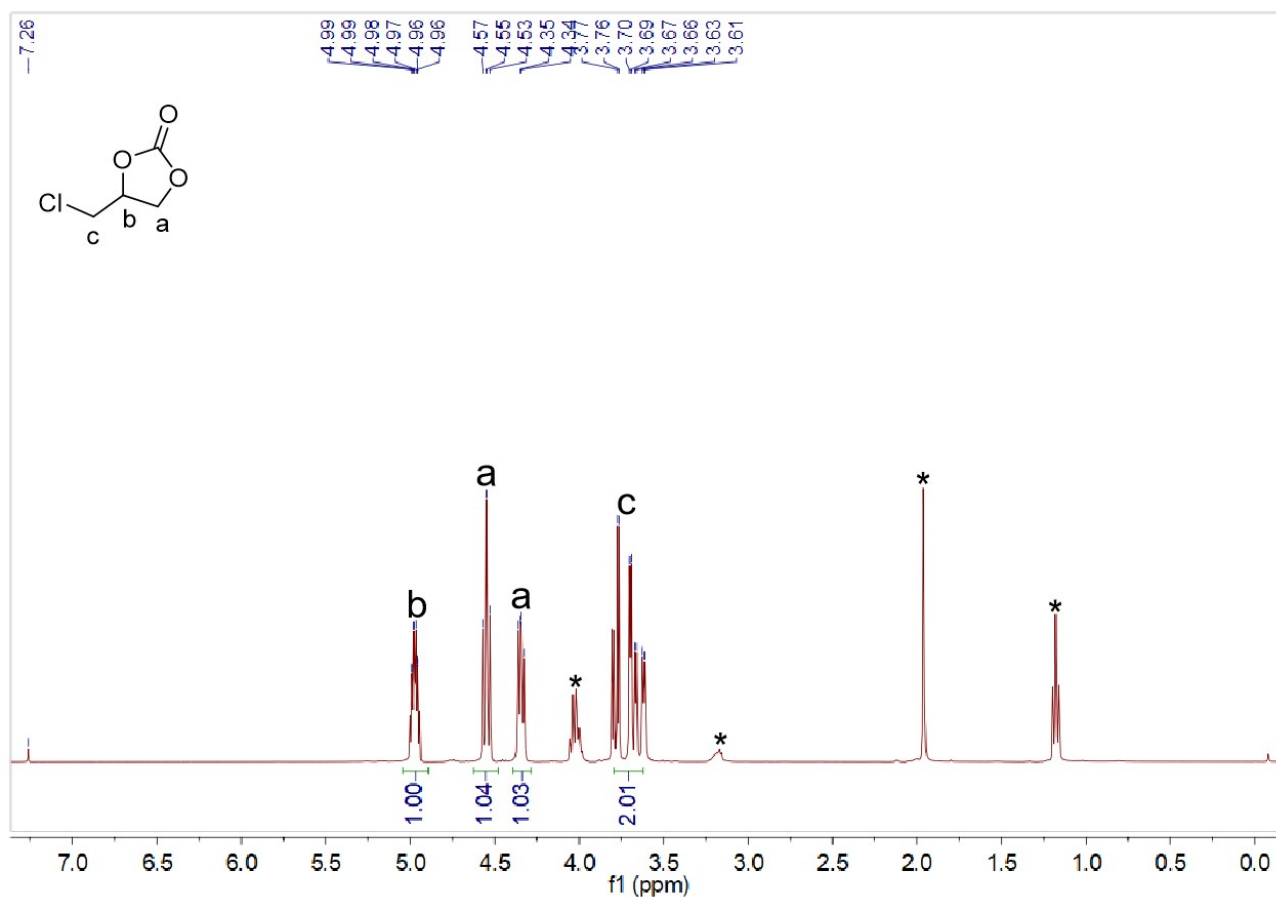

**Fig. S11** <sup>1</sup>H NMR spectrum of 4-(chloromethyl)-1,3-dioxolan-2-one (400 MHz, CDCl<sub>3</sub>): δ=4.99~4.96 (1H, CH), 4.57~4.53 (1H, CH<sub>2</sub>), 4.35~4.34 (1H, CH<sub>2</sub>), 3.77~3.61 ppm (2H, CH<sub>2</sub>). \* represents the residual solvent ethyl acetate. Reaction conditions: VIPA-Br, 30 °C, 72 h, yield of 99%, selectivity of 99%.

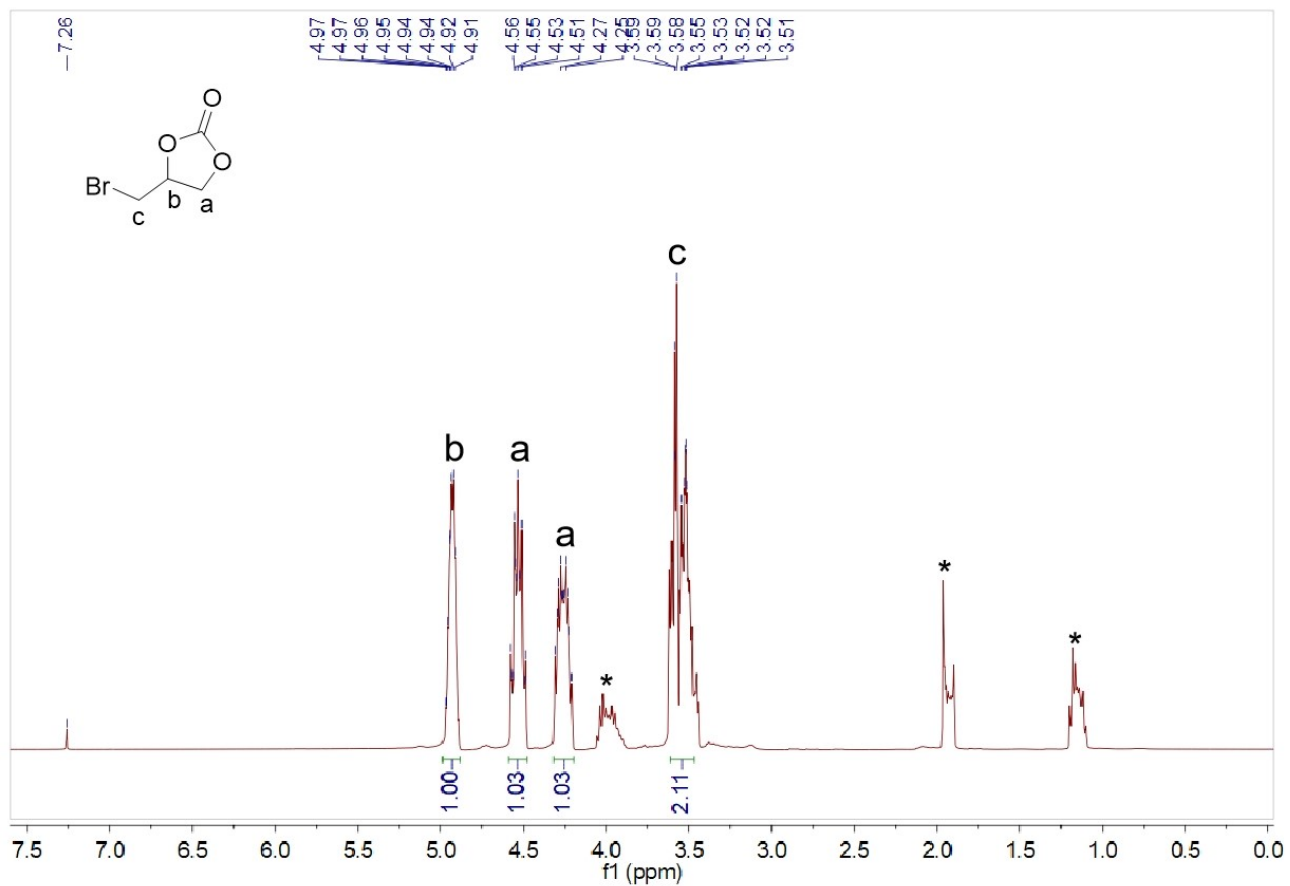

**Fig. S12**  $^1\text{H}$  NMR spectrum of 4-(bromomethyl)-1,3-dioxolan-2-one (400 MHz,  $\text{CDCl}_3$ ):  $\delta=4.97\sim 4.91$  (1H, CH), 4.56~4.51 (1H,  $\text{CH}_2$ ), 4.27~4.25 (1H,  $\text{CH}_2$ ), 3.59~3.51 ppm (2H,  $\text{CH}_2$ ). \* represents the residual solvent ethyl acetate. Reaction conditions: VIPA-Br, 40  $^\circ\text{C}$ , 48 h, yield of 99%, selectivity of 99%.

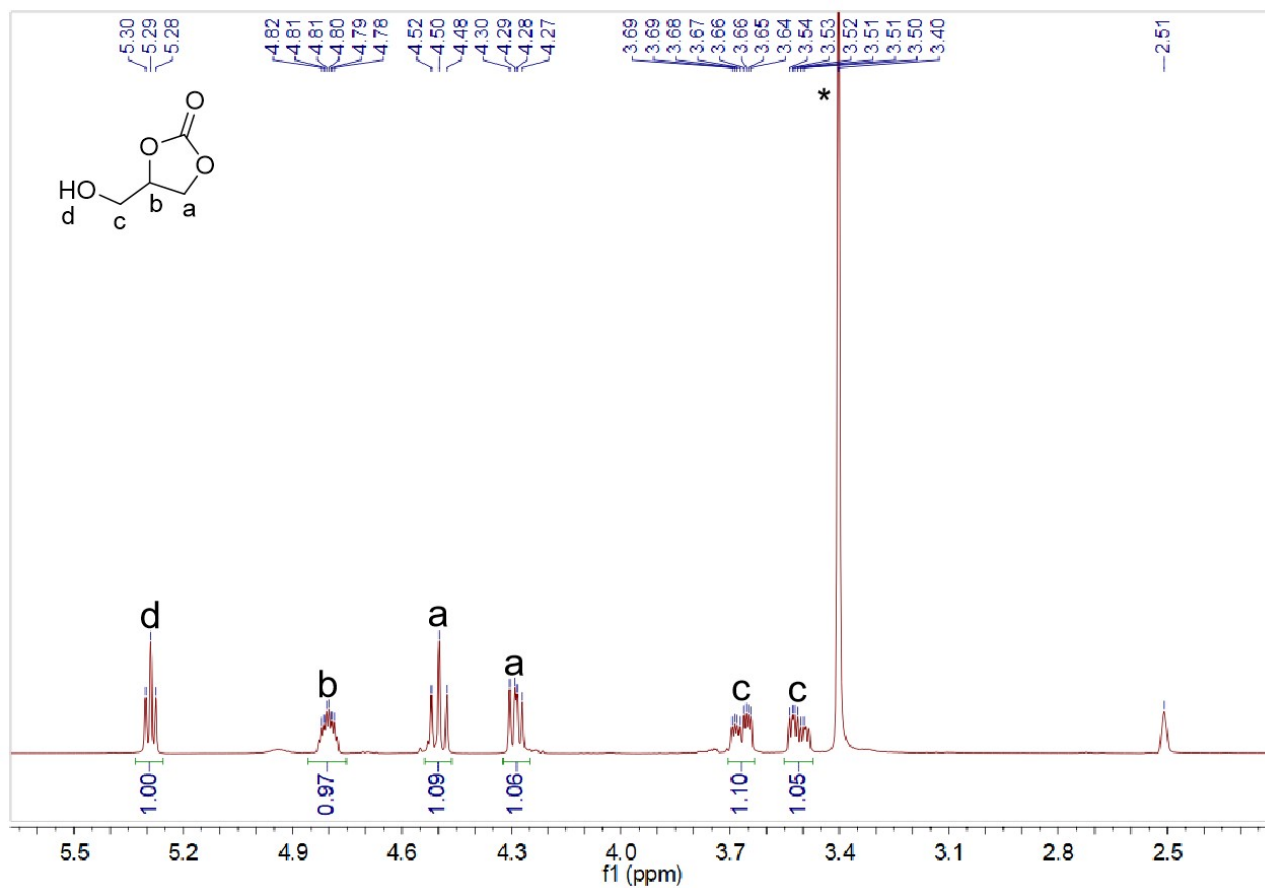

**Fig. S13** <sup>1</sup>H NMR spectrum of 4-(hydroxymethyl)-1,3-dioxolan-2-one (400 MHz, *d*<sub>6</sub>-DMSO):  $\delta$ =5.30~5.28 (1H, OH), 4.82~4.78 (1H, OCH), 4.52~4.48 (1H, CH<sub>2</sub>O), 4.30~4.27 (1H, CH<sub>2</sub>O), 3.69~3.64 (1H, CH<sub>2</sub>OH), 3.54~3.50 ppm (1H, CH<sub>2</sub>OH). \* represents the residual water. Reaction conditions: VIPA-Br, 40 °C, 48 h, the isolated yield of 98%, selectivity of 98%.

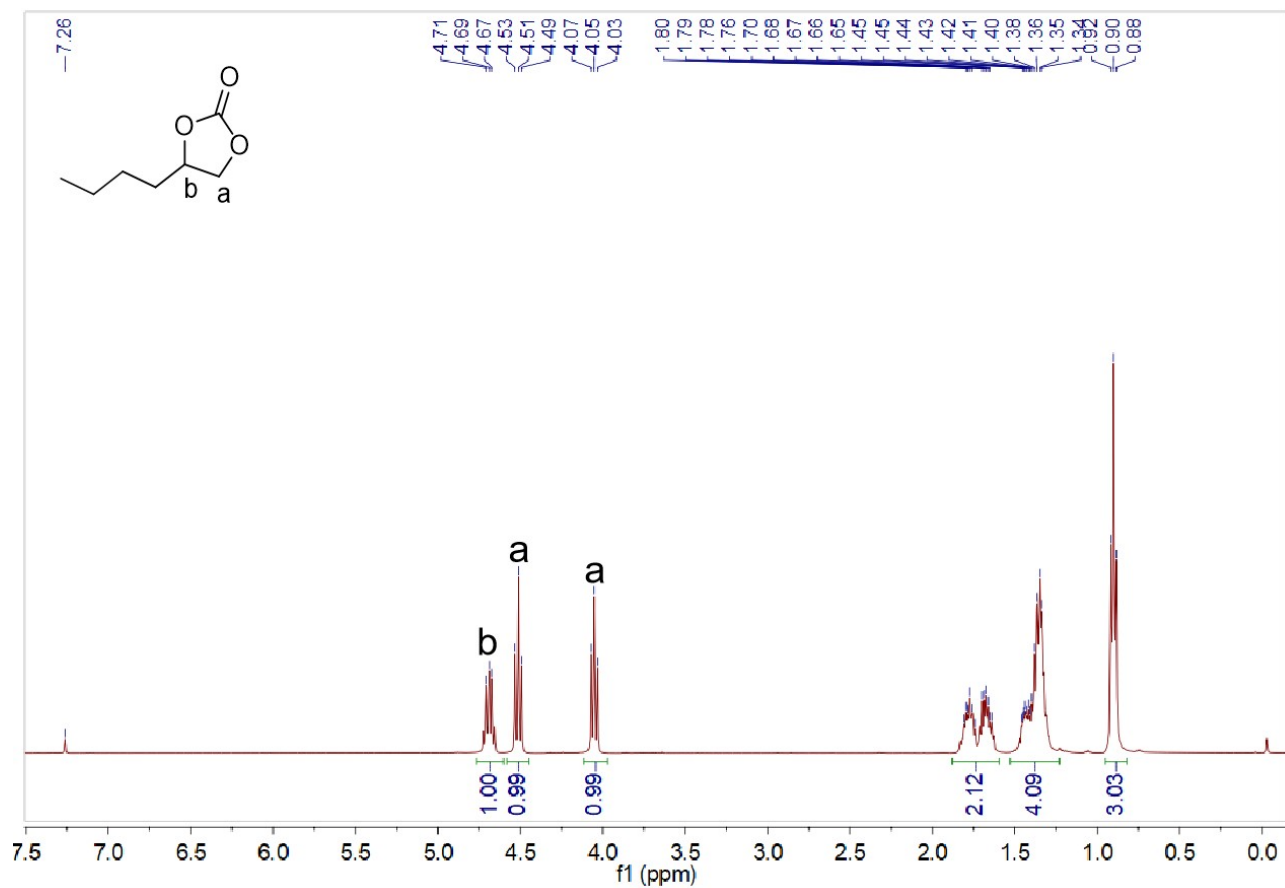

**Fig. S14**  $^1\text{H}$  NMR spectrum of 4-butyl-1,3-dioxolan-2-one (400 MHz,  $\text{CDCl}_3$ ):  $\delta=4.71\sim 4.67$  (1H,  $\text{CH}_2$ ),  $4.53\sim 4.49$  (1H,  $\text{CH}_2$ ),  $4.07\sim 4.03$  (1H,  $\text{CH}_2$ ),  $1.80\sim 1.65$  (2H,  $\text{CH}_2$ ),  $1.45\sim 1.34$  (4H,  $\text{CH}_2$ ),  $0.92\sim 0.88$  ppm (3H,  $\text{CH}_3$ ). Reaction conditions: VIPA-Br,  $80^\circ\text{C}$ , 72 h, the isolated yield of 98%, selectivity of 98%.

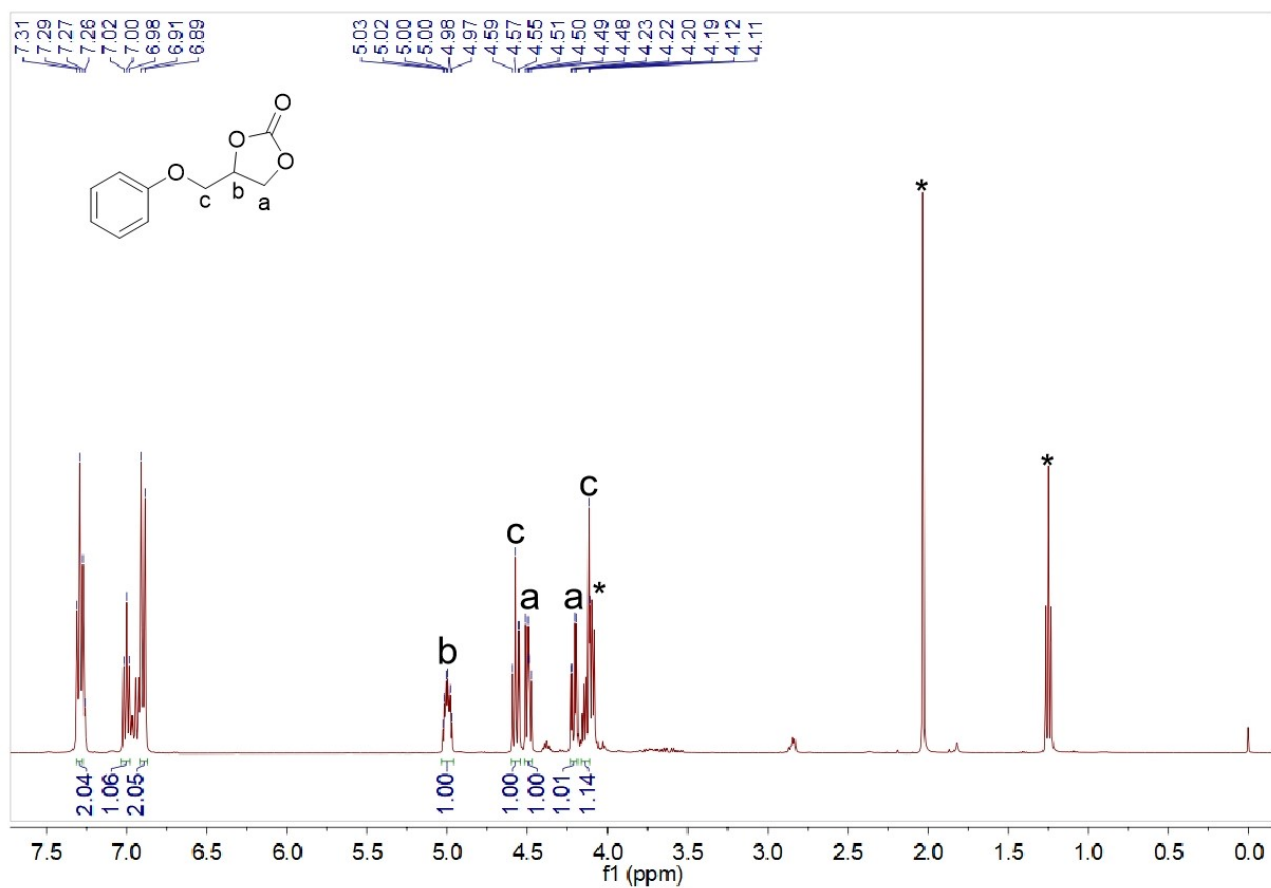

**Fig. S15** <sup>1</sup>H NMR spectrum of 4-(phoxymethyl)-1,3-dioxolan-2-one (400 MHz, CDCl<sub>3</sub>):  $\delta$ =7.31~7.26 (2H, CH), 7.02~6.98 (1H, CH), 6.91~6.89 (2H, CH), 5.03~4.97 (1H, CH), 4.59~4.55 (1H, CH<sub>2</sub>), 4.51~4.48 (1H, CH<sub>2</sub>), 4.23~4.19 (1H, CH<sub>2</sub>), 4.12~4.11 ppm (1H, CH<sub>2</sub>). \* represents the residual solvent ethyl acetate. Reaction conditions: VIPA-Br, 80 °C, 48 h, yield of 99%, selectivity of 99%.



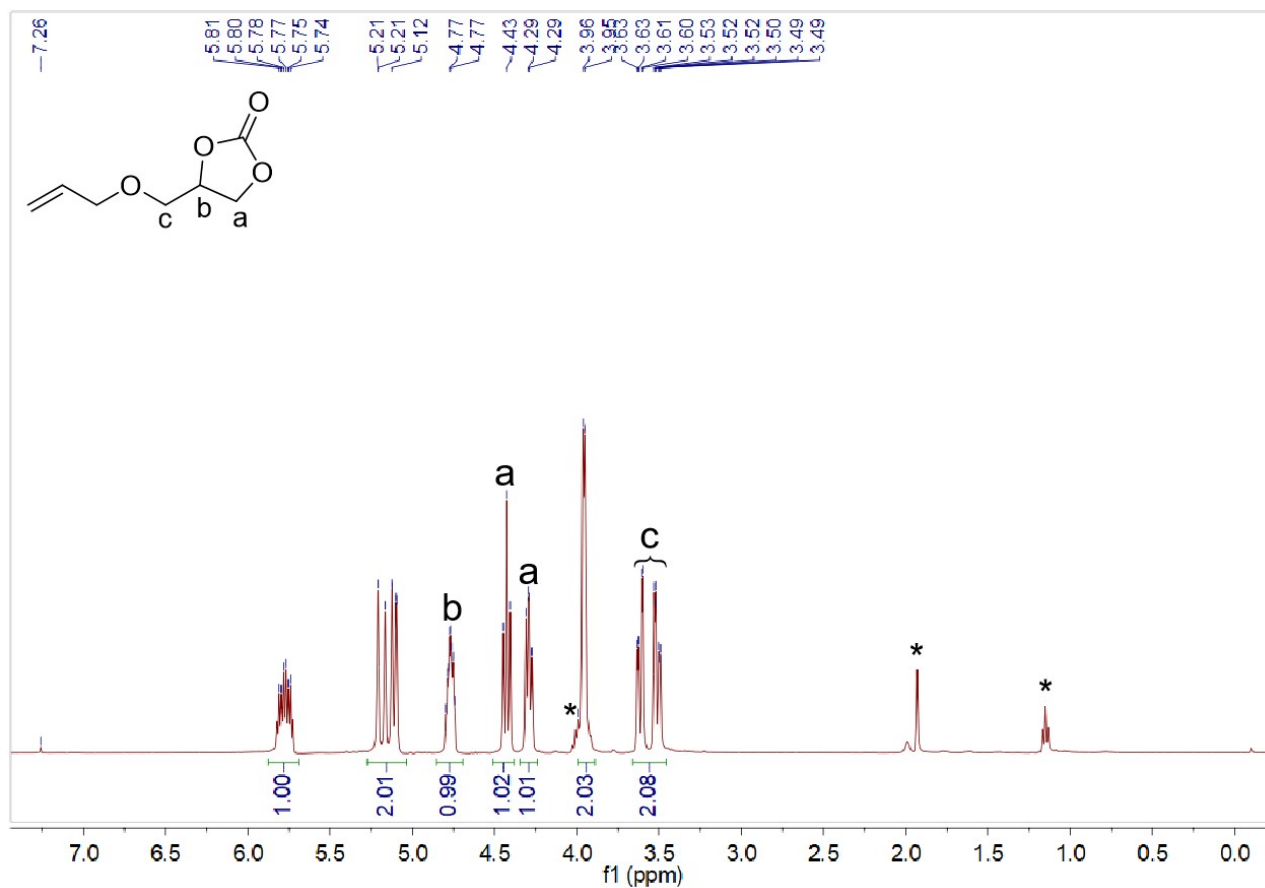

**Fig. S16**  $^1\text{H}$  NMR spectrum of allyloxymethyl-1,3-dioxolan-2-one (400 MHz,  $\text{CDCl}_3$ ):  $\delta=5.81\sim 5.74$  (1H, CH),  $5.21\sim 5.12$  (2H,  $\text{CH}_2$ ),  $4.77$  (1H, CH),  $4.43\sim 4.41$  (1H,  $\text{CH}_2$ ),  $4.29$  (1H,  $\text{CH}_2$ ),  $3.96\sim 3.95$  (2H,  $\text{CH}_2$ ),  $3.63\sim 3.49$  ppm (2H,  $\text{CH}_2$ ). \* represents the residual solvent ethyl acetate. Reaction conditions: VIPA-Br,  $80\text{ }^\circ\text{C}$ , 48 h, the isolated yield of 98%, selectivity of 98%.

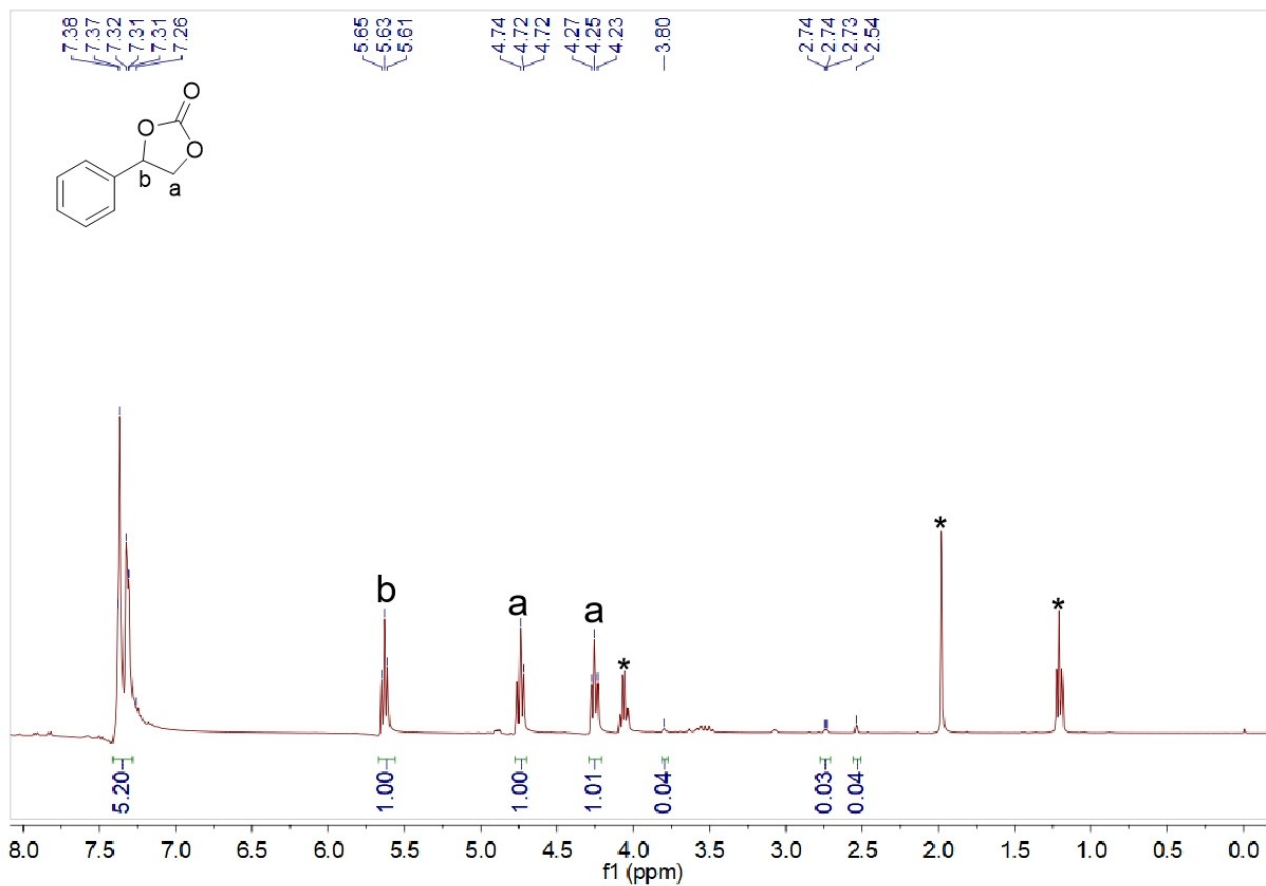

**Fig. S17**  $^1\text{H}$  NMR spectrum of 4-phenyl-1,3-dioxolan-2-one (400 MHz,  $\text{CDCl}_3$ ):  $\delta=7.38\sim 7.26$  (5H, CH), 5.65~5.61 (1H, CH), 4.74~4.72 (1H,  $\text{CH}_2$ ), 4.27~4.23 ppm (1H,  $\text{CH}_2$ ). \* represents the residual solvent ethyl acetate. Reaction conditions: VIPA-Br, 80  $^\circ\text{C}$ , 72 h, yield of 96%, selectivity of 99%.

## References

- S1 O. Buyukcakir, S. H. Je, D. S. Choi, S. N. Talapaneni, Y. Seo, Y. Jung, K. Polychronopoulou and A. Coskun, *Chem. Commun.*, 2016, **52**, 934–937.
- S2 O. Buyukcakir, S. H. Je, S. N. Talapaneni, D. Kim and A. Coskun, *ACS Appl. Mater. Interfaces*, 2017, **9**, 7209–7216.
- S3 C. J. Whiteoak, A. H. Henseler, C. Ayats, A. W. Kleij and M. A. Pericàs, *Green Chem.*, 2014, **16**, 1552–1559.
- S4 T.-T. Liu, R. Xu, J.-D. Yi, J. Liang, X.-S. Wang, P.-C. Shi, Y.-B. Huang and R. Cao, *ChemCatChem*, 2018, **10**, 2036–2040.
- S5 X. Wang, Y. Zhou, Z. Guo, G. Chen, J. Li, Y. Shi, Y. Liu and J. Wang, *Chem. Sci.*, 2015, **6**, 6916–6924.
- S6 S. Subramanian, J. Oppenheim, D. Kim, T. S. Nguyen, W. M. H. Silo, B. Kim, W. A. Goddard III and C. T. Yavuz, *Chem*, 2019, **5**, 3232–3242.
- S7 C. Cui, R. Sa, Z. Hong, H. Zhong and R. Wang, *ChemSusChem*, 2020, **13**, 180–187.
- S8 W. Zhong, F. D. Bobbink, Z. Fei and P. J. Dyson, *ChemSusChem*, 2017, **10**, 2728–2735.
- S9 Y. Xie, Q. Sun, Y. Fu, L. Song, J. Liang, X. Xu, H. Wang, J. Li, S. Tu, X. Lu and J. Li, *J. Mater. Chem. A*, 2017, **5**, 25594–25600.
- S10 Y. Xie, J. Liang, Y. Fu, M. Huang, X. Xu, H. Wang, S. Tu and J. Li, *J. Mater. Chem. A*, 2018, **6**, 6660–6666.
- S11 J. Li, D. Jia, Z. Guo, Y. Liu, Y. Lyu, Y. Zhou and J. Wang, *Green Chem.*, 2017, **19**, 2675–2686.
- S12 G. Chen, X. Huang, Y. Zhang, M. Sun, J. Shen, R. Huang, M. Tong, Z. Long and X. Wang, *Chem. Commun.*, 2018, **54**, 12174–12177.
- S13 Y. Zhang, K. Liu, L. Wu, H. Zhong, N. Luo, Y. Zhu, M. Tong, Z. Long and G. Chen, *ACS Sustainable Chem. Eng.*, 2019, **7**, 16907–16916.
- S14 G. Chen, Y. Zhang, K. Liu, X. Liu, L. Wu, H. Zhong, X. Dang, M. Tong and Z. Long, *J. Mater. Chem. A*, 2021, **9**, 7556–7565.
- S15 Y. Zhang, K. Zhang, L. Wu, K. Liu, R. Huang, Z. Long, M. Tong and G. Chen, *RSC Adv.*, 2020, **10**, 3606–3616.
- S16 Q. Sun, Y. Jin, B. Aguila, X. Meng, S. Ma and F.-S. Xiao, *ChemSusChem*, 2017, **10**, 1160–1165.
- S17 Z. Guo, Q. Jiang, Y. Shi, J. Li, X. Yang, W. Hou, Y. Zhou and J. Wang, *ACS Catal.*, 2017, **7**, 6770–6780.
- S18 K. Hu, Y. Tang, J. Cui, Q. Gong, C. Hu, S. Wang, K. Dong, X. Meng, Q. Sun and F.-S. Xiao, *Chem. Commun.*, 2019, **55**, 9180–9183.
- S19 D. Ma, K. Liu, J. Li and Z. Shi, *ACS Sustainable Chem. Eng.*, 2018, **6**, 15050–15055.

- S20 Y. Zhang, G. Chen, L. Wu, K. Liu, H. Zhong, Z. Long, M. Tong, Z. Yang and S. Dai, *Chem. Commun.*, 2020, **56**, 3309–3312.
- S21 P. Puthiaraj, S. Ravi, K. Yu and W.-S. Ahn, *Appl. Catal. B*, 2019, **251**, 195–205.
- S22 Y. Chen, R. Luo, Q. Xu, J. Jiang, X. Zhou and H. Ji, *ChemSusChem*, 2017, **10**, 2534–2541.
- S23 J. Li, Y. Han, T. Ji, N. Wu, H. Lin, J. Jiang and J. Zhu, *Ind. Eng. Chem. Res.*, 2019, **59**, 676–684.
- S24 Y. Zhang, N. Luo, J. Xu, K. Liu, S. Zhang, Q. Xu, R. Huang, Z. Long, M. Tong and G. Chen, *Dalton Trans.*, 2020, **49**, 11300–11309.
- S25 Y. Zhang, K. Liu, L. Wu, H. Huang, Z. Xu, Z. Long, M. Tong, Y. Gu, Z. Qin and G. Chen, *Dalton Trans.*, 2021, **50**, 11878–11888.
- S26 Y. Xie, J. Liang, Y. Fu, J. Lin, H. Wang, S. Tu and J. Li, *J. CO<sub>2</sub> Util.*, 2019, **32**, 281–289.
- S27 J. Li, Y. Han, H. Lin, N. Wu, Q. Li, J. Jiang and J. Zhu, *ACS Appl. Mater. Interfaces*, 2020, **12**, 609–618.
